1

2 **AEROSOL GENERATION DURING COUGHING - QUANTITATIVE DEFINITION FOR**

3 **AEROSOL GENERATING PROCEDURES: OBSERVATIONAL STUDY** PhD, ENNI

4 SANMARK<sup>1,2</sup>, MD, LOTTA-MARIA A.H. OKSANEN<sup>1,2</sup>, MSc NOORA RANTANEN<sup>1,2</sup>, MD

5 MARI LAHELMA<sup>1,2,3</sup>, Dosent, VELI-JUKKA ANTTILA<sup>1,4</sup>, Professor, LASSE LEHTONEN<sup>1,5</sup>,

6 Dosent, ANTTI-PEKKA HYVÄRINEN<sup>6</sup>, Dosent, AHMED GENEID<sup>1,2</sup>

7 <sup>1</sup> University of Helsinki, Helsinki, Finland

8 Faculty of Medicine

9 <sup>2</sup> Helsinki University Hospital, Helsinki, Finland

10 Department of Otorhinolaryngology and Phoniatics – Head and Neck Surgery

11 <sup>3</sup> Faculty of Science, Mathematics and Statistics

12 <sup>4</sup> Helsinki University Hospital, Helsinki, Finland

13 HUS Inflammation Center

14 <sup>5</sup> Helsinki University Hospital, Helsinki, Finland, HUS Diagnostic Center, HUSLAB

15 <sup>6</sup>Finnish Meteorological Institute, Helsinki, Finland

16

17 **Corresponding author:**

18 Enni Sanmark:

19 Address: Valhallankatu 7a 21, 00250 Helsinki

20 E-mail: [enni@sanmark.fi](mailto:enni@sanmark.fi)

21 Telephone: +358-408446940

22 ORCID: 0000-0003-0209-5501

23

24

25

26 **ABSTRACT**

27

28 **Aim:** The purpose of the study was to determine aerosol exposure generated by coughing in

29 operation room environments to create a quantitative limit value for high-risk aerosol-generating

30 medical procedures.

31 **Background:** Coughing is known to produce a significant amount of aerosols and is thus commonly

32 used as a best reference for high-risk aerosol-generation. Accordingly, procedures during which

33 aerosol generation exceeds the amount of aerosol generated in instances of coughing are seen as

34 high-risk aerosol generating procedures. However, no reliable quantitative values are available for

35 high-risk aerosol-generation.

36 Methods: Coughing was measured from 37 healthy volunteers in the operating room environment.

37 Aerosol particles generated during coughing within the size range of 0.3–10 µm were measured

38 with Optical Particle Sizer from 40cm, 70cm, and 100cm distances. The distances reflected

39 potential exposure distances where personnel are during surgeries.

40 Results: A total of 306 coughs were measured. Average aerosol concentration during coughing was

41  $1.580 \pm 13.774$  particles/cm<sup>3</sup> (range 0.000 – 195.528).

42 Discussion: The aerosol concentration measured in this study can be used as a limit for high-risk

43 aerosol generation in the operating room environment when assessing the aerosol generating

44 procedures and the risk of operating room staff's exposure for aerosol particles.

45

46 **ABBREVIATIONS:** Aerosol generating procedure (AGP), operating room (OR)

47 **RUNNIG TITLE** Aerosol generation during coughing

48

49 **KEYWORDS** Aerosol generating procedure, COVID-19, Cough, Optical Particle Sizer, Aerosol

50

51

52

53

54

55

56

57

58

59

60

61

62

63

64

65

66

67

68

69

70

71

72 **INTRODUCTION**

73

74 Airborne transmission has recently been recognized as an important transmission route of COVID-  
75 19 as well as for many other respiratory infections such as tuberculosis and influenza [1-4].  
76 Aerosol particles, which can potentially carry pathogens, are generated for example when breathing,  
77 talking, and coughing, but also presumably during certain surgical procedures performed in the  
78 respiratory tract area where infective pathogens are known to be found. Fear about the spread of  
79 COVID-19 during surgeries has led, for example in the field of otorhinolaryngology, to  
80 cancellations of surgeries, minimization of staff in the operating room (OR), and changes in  
81 personal protective equipment (PPE) guidelines during the current pandemic [5-7].

82

83 Traditionally, aerosols have been defined as particles smaller than  $5\mu\text{m}$  in size that can remain in  
84 the air for long periods of time and spread far into space. However, environmental factors have a  
85 significant effect on the dispersion of aerosols and there has been a recent debate regarding whether  
86 all particles below  $100\mu\text{m}$  should be considered as aerosols [8, 9]. Overall, aerosol generation is a  
87 continuum from the smallest aerosols to larger droplet-sized particles, depending on source.  
88 Nonetheless, smaller aerosols are present in higher number and tend to spread the farthest and  
89 particles smaller than  $5\mu\text{m}$  have been found to carry the majority of pathogens [10-12]. Findings  
90 related to COVID-19 support this assumption: SARS-CoV-2 has been detected in particles  $0.25\text{--}$   
91  $1.0\mu\text{m}$ ,  $1\text{--}4\mu\text{m}$ , and  $> 4\mu\text{m}$ . Most results are obtained by PCR, but infectious virus has also been  
92 detected in viral culture [13-15]. These facts together make small ( $<5\mu\text{m}$ ) particles most  
93 challenging for infection control measures[16].

94

95 When assessing the risk of infection, the infectious dose associated with the pathogen, the time of  
96 exposure and the number of pathogens should be considered. However, both infectious doses of  
97 different airborne pathogens and the number of infectious pathogens contained in aerosol particles  
98 are yet widely unknown and require further investigation before they can be reliably used as part of

99 a risk assessment for airborne diseases. Therefore, procedures performed in health care, such as  
100 surgeries, have been classified as potentially aerosol-generating procedures (AGP) or high-risk  
101 AGPs based mainly on the area to be operated and the instruments used, with no degree of  
102 quantification [17, 18].

103

104 Coughing is known to produce a potentially infectious amount of aerosols and it has recently been  
105 used as a quantitative reference for high-risk aerosol generation during surgeries and other clinical  
106 procedures [19-21]. It could be said that the current list of aerosol generating procedures is not valid  
107 as knowledge of aerosol generation has changed during the pandemic. Many questions persist about  
108 quanta and epidemiology in each disease. Procedures in which aerosol generation exceeds the  
109 amount of aerosol concentration produced by coughing are those that could be considered t high-  
110 risk aerosol generating procedures (AGP) until further knowledge is obtained [22]. This definition  
111 does not take a position on the infectious dose, but together with the exposure time provides an  
112 estimate of the potential exposure to airborne pathogens

113 The amount of exposure received by OR staff during the procedure is a key factor in aerosol risk  
114 assessment, rather than the total aerosol concentration generated, as highly effective ventilation  
115 does lower exposure. Therefore, the purpose of our study was to determine an adequate and  
116 quantitative value for high-risk AGPs from the perspective of OR staff by measuring the amount of  
117 particle concentration that a person in the OR is exposed to. The results of this study can be applied  
118 by comparing the concentration and size distribution of aerosol produced during surgical  
119 procedures with the concentration produced by coughing and by estimating the duration of the  
120 operation. In the future, as information on infectious doses of various airborne diseases increases,  
121 this can be combined with risk assessment.

122

123 **METHODS** We recruited 37 healthy volunteers to cough in OR and measured the particle  
124 generation during coughing. In addition, 15 patients' involuntary cough episodes were measured  
125 separately when they woke up from general anesthesia or were under local anesthesia. Coughs  
126 during extubations were excluded. We compared volitional and involuntary coughing to ensure that  
127 there was no significant difference between these allowing a more accurate quantitative assessment  
128 of volitional coughs. All measurements were conducted in the Helsinki University Hospital,  
129 between December 2020 and February 2021. The ORs had Recair 4C ventilation system with  
130 HEPA-14 filtration, and ultra-clean ventilation in the laminar area of 1210–1298 l/s generating 400  
131 - 572,83 air changes per hour. Measurements were performed with the Optical particle sizer (OPS),  
132 model TSI model 3330 measuring the size range from 0.3 to 10  $\mu\text{m}$  and flow rate of 1l/min.  
133  
134 OPS was situated 40 cm, 70 cm, and 100cm from the volunteers to reflect the same distances and  
135 thus same particle amounts which OR staff, operating physicians, or assisting nurses are exposed to  
136 during surgical operations. Involuntary cough measurements were performed an average of 124 cm  
137 (range 40–180 cm) from the patient. No additional collection methods, for example funnels, were  
138 used to reflect the actual particle exposure in a certain spot (OR personnels' mouth) in the OR  
139 environment. Volunteers were asked to cough as hard as possible for three to five times from each  
140 distance. Each cough episode was measured separately ensuring that the particles from previous  
141 coughs had time to clear from the OR. Coughs were directed towards the OPS device, and particle  
142 concentration was measured with a 5- or 10-second scale interval. For each cough, several  
143 measurements were collected for 10 seconds.

144

145 The size dependent aerosol concentrations measured with OPS were normalized with respect to the  
146 sizing bin widths within 0.3 to 10  $\mu\text{m}$ . The particle number size distributions and total particle  
147 concentrations per cubic centimeter were calculated. The particles were categorized based on the

148 diameter as follows:  $<1\ \mu\text{m}$ ,  $1\text{--}5\ \mu\text{m}$ , and  $>5\ \mu\text{m}$ . Due to infection risk being related to cumulative  
149 aerosol exposure, the mean was calculated for each patient at each coughing distance as a statistical  
150 representative. Pairwise comparisons between voluntary and involuntary coughing were calculated  
151 using unpaired Student's t-test with Benjamini-Yekutieli procedure for multiple comparisons with  
152 5% false discovery rate[23]. Prior comparisons the data was log<sub>10</sub> normalized. The analyses were  
153 performed using Microsoft Excel 2016 (Microsoft Corporation, Redmond, Washington, USA), and  
154 GraphPad Prism version 9.0.2 for Mac (GraphPad Software, San Diego, California USA) or  
155 RStudio version 1.3.959 (R Foundation for Statistical Computing, Vienna, Austria). Measured  
156 minimum concentration in all size classes was 0.000. A p-value  $<0.05$  was considered to be  
157 statistically significant. STROBE reporting guidelines were followed when preparing the  
158 manuscript.

159

160 All procedures that involved human participants were conducted in accordance with the ethical  
161 standards of the institutional or national research committee and the 1964 Declaration of Helsinki  
162 and its later amendments or comparable ethical standards. The Ethics Committee of Helsinki  
163 University Hospital approved the study protocol (HUS/1701/2020). All participants provided  
164 written informed consent prior to their participation.

165

166 **RESULTS AND ANALYSIS** A total of 306 coughs were measured from 37 healthy volunteers.  
167 The detailed information about particle concentrations when coughing from different distances are  
168 presented in **Table 1**. All background concentrations were very low (maximum mean total  
169 concentration  $0.0053\ \text{particles}/\text{cm}^3$ ) which enabled the accurate evaluation of particle concentration  
170 generated during the procedure. The comparison of involuntary coughs from 15 patients to  
171 volitional coughs are presented in **Figure 1**. Mean particle concentration during involuntary coughs  
172 was  $0.140\ \text{p}/\text{cm}^3 \pm 0.332$  (range  $0.006\text{--}1.308$ ) for particles  $<1\ \mu\text{m}$ ,  $0.025\ \text{p}/\text{cm}^3 \pm 0.068$  (range

173 0.000–0.270) for particles 1–5  $\mu\text{m}$  and  $0.002 \text{ p/cm}^3 \pm 0.006$  (range 0.000–0.024) for particles >5  
 174  $\mu\text{m}$ . These measurements were compared with volitional coughs to determine whether the collected  
 175 data also describes involuntary coughing. There were no significant differences between volitional  
 176 and involuntary coughing at any particle size category ( $p=0.244$ – $0.883$ ).

177

178 **Table 1.** Observed particle concentration during volitional coughing from different distances

| Measured cough episodes, n                                                             |               | All<br>(n=74)      | 40 cm from<br>source<br>(n=37) | 70 cm from<br>source<br>(n=15) | 100 cm from<br>source<br>(n=22) |
|----------------------------------------------------------------------------------------|---------------|--------------------|--------------------------------|--------------------------------|---------------------------------|
| <b>Total particle concentration (particles/cm<sup>3</sup>)</b>                         | Median        | 0.055              | 0.055                          | 0.026                          | 0.070                           |
|                                                                                        | Mean $\pm$ SD | $1.706 \pm 10.802$ | $0.923 \pm 5.078$              | $0.091 \pm 0.136$              | $4.12 \pm 18.771$               |
|                                                                                        | Range         | 0.000 – 88.157     | 0.013 – 30.973                 | 0.000 – 0.466                  | 0.016 – 88.157                  |
| <b>&lt;1<math>\mu\text{m}</math> particle concentration (particles/cm<sup>3</sup>)</b> | Median        | 0.044              | 0.043                          | 0.026                          | 0.053                           |
|                                                                                        | Mean $\pm$ SD | $1.692 \pm 10.791$ | $0.906 \pm 5.030$              | $0.087 \pm 0.133$              | $4.111 \pm 18.770$              |
|                                                                                        | Range         | 0.000 – 88.141     | 0.011 – 30.668                 | 0.000 – 0.454                  | 0.011 – 88.141                  |
| <b>1–5<math>\mu\text{m}</math> particle concentration (particles/cm<sup>3</sup>)</b>   | Median        | 0.008              | 0.008                          | 0.002                          | 0.013                           |
|                                                                                        | Mean $\pm$ SD | $0.013 \pm 0.035$  | $0.017 \pm 0.049$              | $0.004 \pm 0.004$              | $0.013 \pm 0.006$               |
|                                                                                        | Range         | 0.000 – 0.304      | 0.000 – 0.304                  | 0.000 – 0.012                  | 0.004 – 0.028                   |
| <b>&gt;5<math>\mu\text{m}</math> particle concentration (particles/cm<sup>3</sup>)</b> | Median        | 0.000              | 0.000                          |                                | 0.001                           |
|                                                                                        | Mean $\pm$ SD | $0.001 \pm 0.001$  | $0.001 \pm 0.001$              | NA                             | $0.001 \pm 0.001$               |
|                                                                                        | Range         | 0.000 – 0.005      | 0.000 – 0.005                  |                                | 0.000 – 0.004                   |

179

180 SD, standard deviation.

181

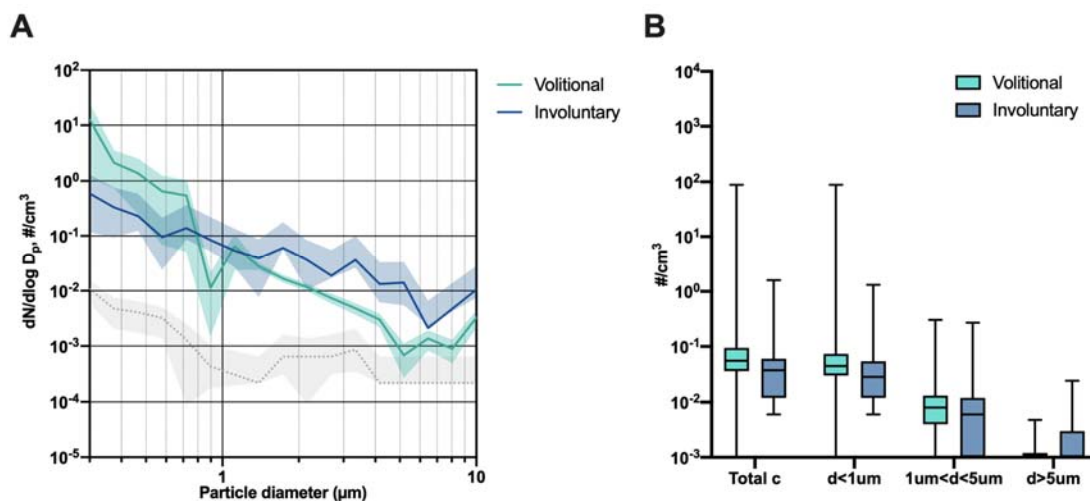

182

183 **Figure 1: Volitional coughing vs. involuntary coughing.** (A) Average aerosol size distributions presented with the  
184 background (dotted line) during volitional and anesthesia coughs (involuntary) expressed as mean (line) with 95%  
185 confidence interval (envelopes). (B) Total concentrations and concentrations of <1µm, 1–5µm and >5µm aerosols  
186 during volitional and anesthesia coughs (involuntary), presented as median with interquartile range (box) and range  
187 (whiskers). Volitionally coughing patients, n=37 (coughs n=306); involuntary coughing patients, n=15 (coughs n=15).  
188 c, concentration; D<sub>p</sub>, particle diameter; N, particle number  
189

## 190 DISCUSSION

191 In this study we defined a quantitative estimate for high-risk AGP when assessing the risk of  
192 exposure of OR staff. By considering the time spent on the OR, as well as the risk of the patient's  
193 possible airborne disease, a rough risk assessment of the staff's risk during the procedure was  
194 formed. As information on the pathogens contained in aerosol particles as well as infectious doses  
195 of airborne diseases increases, these factors can later replace the role of coughing in the risk  
196 assessment. Our methodology provides a numeric limit value for the exposure faced by a staff  
197 member in an OR environment already considering the environmental factors that affect aerosol  
198 dispersion in the space. Thus, the values we measured can be used as a reference when assessing  
199 other AGPs that OR staff are exposed to [24].

200 Our results in relation to the aerosol concentration generated by coughing and the role of coughing  
201 as an aerosol generating behaviors (AGBs) are in a line with a recent systematic review. However,



202 we have a higher number of records, we made the systematic distance-dependent evaluation, and  
203 we systematically determined aerosol concentrations, which collectively strengthen our study [25].  
204 In our study, the highest aerosol concentrations were observed at 100 cm distance. This is probably  
205 due to the methodology: the flow rate of OPS is 1l/min. When measuring particles with high  
206 acceleration at close range, some particles bypass the device and are not recorded. When distance  
207 increases further, the acceleration of the particles is reduced, and they are observed more accurately.  
208 However, OPS is currently the most suitable and used measuring device, especially in OR  
209 conditions, so when examining the generation of aerosols during surgical procedures its use is  
210 justified despite the limitations.

211 The large range and personal differences of the particle concentrations observed in our study is  
212 naturally seen in different respiratory activities and related to heterogeneity of the cough[26].  
213 However, taking into account similar concentrations of volitional and involuntary coughs, we can  
214 state that the presented data is well representative of the average aerosol concentrations generated  
215 during coughing. A previous study of Lee et al. showed that infected patients generated a greater  
216 number of particles when coughing compared to the healthy ones[27]. Thus, it could be stated that  
217 the particle concentration seen in our results is the minimum value to determine the limit of AGP.

218 Whether the definition for AGP is useful at all can be discussed. Understanding humans as aerosol  
219 generators during normal respiratory activities has grown and the term aerosol generating behaviors  
220 (AGBs) are proposed alongside the AGP [25] However, statistics from around the world show that  
221 surgeries involving mucus membranes and respiratory track area were significantly reversed during  
222 the COVID-19 pandemic due to the fear of infection. Thus, quantitative variables used for risk  
223 assessment are a step forward from previous intuitive measures toward more comprehensive risk  
224 assessment.

225 **CONCLUSION** This study provides a standard for aerosol concentration and size distribution for  
226 aerosols generated when coughing to act as reference for high-risk aerosol generation during  
227 surgical procedures performed in the OR.

228 **ACKNOWLEDGMENTS** We thank Catharina Pomoell for her great work as a research nurse.

229 **CONFLICT OF INTEREST DISCLOSURES:** None of the authors has any financial or other  
230 relationships that might lead to a conflict of interest.

231 **INFORMED CONSENT:** All patients provided written informed consent prior to participating in  
232 the study.

233 **FUNDING:** NA

234 **ROLES OF AUTHORS BASED ON ICJME STANDARDS:** All authors have approved the  
235 manuscript and have made significant contributions:

236 Conceptualization (ES, LMO, VJA, LL); methodology (ES, LMO, APH, VJA, AG); validation (ES,  
237 LMO, APH); formal analysis (ES, LOM, NR, ML, APH); investigation (ES, LMO, NR); resources  
238 (ES, AG); writing original draft (ES); writing – review & editing (LMO, NR, ML, APH, LL, VJA,  
239 AG); visualization (NR, ML); editing (ES); project administration (ES, LMO, AG; VJA); funding  
240 (ES; APH; AG)

241  
242  
243  
244  
245  
246  
247  
248  
249  
250  
251  
252  
253  
254  
255  
256  
257

258  
259  
260  
261  
262  
263  
264  
265  
266  
267  
268  
269  
270  
271  
272  
273  
274  
275  
276  
277  
278  
279  
280  
281  
282  
283  
284  
285  
286  
287  
288

## REFERENCES

- 289 1. Pai M, Behr MA, Dowdy D, Dheda K, Divangahi M, Boehme CC, et al. Tuberculosis.  
290 Nat Rev Dis Primers. 2016;2:16076. Epub 2016/10/28. doi: 10.1038/nrdp.2016.76. PubMed PMID:  
291 27784885.
- 292 2. Jones RM, Brosseau LM. Aerosol transmission of infectious disease. J Occup Environ  
293 Med. 2015;57(5):501-8. Epub 2015/03/31. doi: 10.1097/JOM.0000000000000448. PubMed PMID:  
294 25816216.
- 295 3. Cowling BJ, Ip DK, Fang VJ, Suntarattiwong P, Olsen SJ, Levy J, et al. Aerosol  
296 transmission is an important mode of influenza A virus spread. Nat Commun. 2013;4:1935. Epub  
297 2013/06/06. doi: 10.1038/ncomms2922. PubMed PMID: 23736803; PubMed Central PMCID:  
298 PMC3682679.
- 299 4. Morawska L, Tang JW, Bahnfleth W, Bluysen PM, Boerstra A, Buonanno G, et al.  
300 How can airborne transmission of COVID-19 indoors be minimised? Environ Int.  
301 2020;142:105832. Epub 2020/06/11. doi: 10.1016/j.envint.2020.105832. PubMed PMID:  
302 32521345; PubMed Central PMCID: PMC7250761 competing financial interests or personal  
303 relationships that could have appeared to influence the work reported in this paper.
- 304 5. Arman S, Hopkins M, McKean S. The impact of COVID-19 on elective  
305 otolaryngology surgery in a rural hospital in the United Kingdom. Clin Otolaryngol. 2021. Epub  
306 2021/06/27. doi: 10.1111/coa.13830. PubMed PMID: 34174165.

- 307 6. Givi B, Moore MG, Bewley AF, Coffey CS, Cohen MA, Hessel AC, et al. Advanced  
308 head and neck surgery training during the COVID-19 pandemic. *Head Neck*. 2020;42(7):1411-7.  
309 Epub 2020/05/10. doi: 10.1002/hed.26252. PubMed PMID: 32383550.
- 310 7. Kowalski LP, Sanabria A, Ridge JA, Ng WT, de Bree R, Rinaldo A, et al. COVID-19  
311 pandemic: Effects and evidence-based recommendations for otolaryngology and head and neck  
312 surgery practice. *Head Neck*. 2020;42(6):1259-67. Epub 2020/04/10. doi: 10.1002/hed.26164.  
313 PubMed PMID: 32270581; PubMed Central PMCID: PMC7262203.
- 314 8. Vuorinen V, Aarnio M, Alava M, Alopaeus V, Atanasova N, Auvinen M, et al.  
315 Modelling aerosol transport and virus exposure with numerical simulations in relation to SARS-  
316 CoV-2 transmission by inhalation indoors. *Saf Sci*. 2020;130:104866. Epub 2020/08/25. doi:  
317 10.1016/j.ssci.2020.104866. PubMed PMID: 32834511; PubMed Central PMCID:  
318 PMC7428778.
- 319 9. Fernstrom A, Goldblatt M. Aerobiology and its role in the transmission of infectious  
320 diseases. *J Pathog*. 2013;2013:493960. Epub 2013/02/01. doi: 10.1155/2013/493960. PubMed  
321 PMID: 23365758; PubMed Central PMCID: PMC3556854.
- 322 10. Lindsley WG, Blachere FM, Thewlis RE, Vishnu A, Davis KA, Cao G, et al.  
323 Measurements of airborne influenza virus in aerosol particles from human coughs. *PLoS One*.  
324 2010;5(11):e15100. Epub 2010/12/15. doi: 10.1371/journal.pone.0015100. PubMed PMID:  
325 21152051; PubMed Central PMCID: PMC2994911.
- 326 11. Patterson B, Morrow C, Singh V, Moosa A, Gqada M, Woodward J, et al. Detection  
327 of *Mycobacterium tuberculosis* bacilli in bio-aerosols from untreated TB patients. *Gates Open Res*.  
328 2017;1:11. Epub 2018/06/08. doi: 10.12688/gatesopenres.12758.2. PubMed PMID: 29355225;  
329 PubMed Central PMCID: PMC5757796.
- 330 12. Fennelly KP, Jones-López EC, Ayakaka I, Kim S, Menyha H, Kirenga B, et al.  
331 Variability of infectious aerosols produced during coughing by patients with pulmonary  
332 tuberculosis. *American journal of respiratory and critical care medicine*. 2012;186(5):450-7.
- 333 13. Liu Y, Ning Z, Chen Y, Guo M, Liu Y, Gali NK, et al. Aerodynamic analysis of  
334 SARS-CoV-2 in two Wuhan hospitals. *Nature*. 2020;582(7813):557-60. Epub 2020/04/28. doi:  
335 10.1038/s41586-020-2271-3. PubMed PMID: 32340022.
- 336 14. Chia PY, Coleman KK, Tan YK, Ong SWX, Gum M, Lau SK, et al. Detection of air  
337 and surface contamination by SARS-CoV-2 in hospital rooms of infected patients. *Nat Commun*.  
338 2020;11(1):2800. Epub 2020/05/31. doi: 10.1038/s41467-020-16670-2. PubMed PMID: 32472043;  
339 PubMed Central PMCID: PMC7260225.
- 340 15. Lednicky JA, Lauzardo M, Alam MM, Elbadry MA, Stephenson CJ, Gibson JC, et al.  
341 Isolation of SARS-CoV-2 from the air in a car driven by a COVID patient with mild illness. *Int J*  
342 *Infect Dis*. 2021;108:212-6. Epub 2021/04/27. doi: 10.1016/j.ijid.2021.04.063. PubMed PMID:  
343 33901650; PubMed Central PMCID: PMC8064821.
- 344 16. Abbey H. An examination of the Reed-Frost theory of epidemics. *Human biology*.  
345 1952;24(3):201.
- 346 17. Lagos AE, Ramos PH, Andrade T. Protection for Otolaryngologic Surgery in the  
347 COVID-19 Pandemic. *OTO Open*. 2020;4(2):2473974X20934734. Epub 2020/06/20. doi:  
348 10.1177/2473974X20934734. PubMed PMID: 32551408; PubMed Central PMCID:  
349 PMC7281886.
- 350 18. Krajewska J, Krajewski W, Zub K, Zatonski T. COVID-19 in otolaryngologist  
351 practice: a review of current knowledge. *Eur Arch Otorhinolaryngol*. 2020;277(7):1885-97. Epub  
352 2020/04/20. doi: 10.1007/s00405-020-05968-y. PubMed PMID: 32306118; PubMed Central  
353 PMCID: PMC7166003.
- 354 19. Organization WH.  
355 Transmission of SARS-CoV-2: implications for infection prevention precautions 2020 [updated 9  
356 July 2020; cited 2020 9 July 2020].

- 357 20. Brown J, Gregson FKA, Shrimpton A, Cook TM, Bzdek BR, Reid JP, et al. A  
358 quantitative evaluation of aerosol generation during tracheal intubation and extubation.  
359 Anaesthesia. 2021;76(2):174-81. Epub 2020/10/07. doi: 10.1111/anae.15292. PubMed PMID:  
360 33022093; PubMed Central PMCID: PMCPMC7675579.
- 361 21. Lindsley WG, King WP, Thewlis RE, Reynolds JS, Panday K, Cao G, et al.  
362 Dispersion and exposure to a cough-generated aerosol in a simulated medical examination room. J  
363 Occup Environ Hyg. 2012;9(12):681-90. Epub 2012/10/05. doi: 10.1080/15459624.2012.725986.  
364 PubMed PMID: 23033849; PubMed Central PMCID: PMCPMC4688889.
- 365 22. Jackson T, Deibert D, Wyatt G, Durand-Moreau Q, Adisesh A, Khunti K, et al.  
366 Classification of aerosol-generating procedures: a rapid systematic review. BMJ Open Respir Res.  
367 2020;7(1). Epub 2020/10/12. doi: 10.1136/bmjresp-2020-000730. PubMed PMID: 33040021;  
368 PubMed Central PMCID: PMCPMC7549490.
- 369 23. Benjamini Y, Yekutieli D. The control of the false discovery rate in multiple testing  
370 under dependency. Annals of statistics. 2001;11:165-88.
- 371 24. Prather KA, Marr LC, Schooley RT, McDiarmid MA, Wilson ME, Milton DK.  
372 Airborne transmission of SARS-CoV-2. Science. 2020;370(6514):303-4. Epub 2020/10/07. doi:  
373 10.1126/science.abf0521. PubMed PMID: 33020250.
- 374 25. Chacon AM, Nguyen DD, McCabe P, Madill C. Aerosol-generating behaviours in  
375 speech pathology clinical practice: A systematic literature review. PLoS One.  
376 2021;16(4):e0250308. Epub 2021/04/29. doi: 10.1371/journal.pone.0250308. PubMed PMID:  
377 33909654.
- 378 26. Mazzone SB, Farrell MJ. Heterogeneity of cough neurobiology: Clinical implications.  
379 Pulm Pharmacol Ther. 2019;55:62-6. Epub 2019/02/15. doi: 10.1016/j.pupt.2019.02.002. PubMed  
380 PMID: 30763726.
- 381 27. Jinho Lee DY, Seunghun Ryu, Seunghon Ham, Kiyong Lee, Myoungsok Yeo,  
382 Kyoungbok Min, Chungsik Yoon Quantity, Size Distribution, and Characteristics of Cough-  
383 generated Aerosol Produced by Patients with an Upper Respiratory Tract Infection. Aerosol and Air  
384 Quality Research. 2019;19(4):840-53. doi: <https://doi.org/10.4209/aaqr.2018.01.0031>  
385

386

387 .

388

389

390

391

392

393

394

395

396

397

398

399

400

401

402

403

404  
405  
406  
407  
408  
409  
410  
411  
412  
413  
414  
415  
416  
417  
418  
419  
420  
421  
422  
423  
424  
425  
426  
427  
428  
429  
430  
431  
432  
433  
434  
435  
436  
  
437  
438  
439  
440  
441  
442  
443  
444  
445  
446  
447  
448  
449  
450  
451  
452
